# Supplementary material
Source: Springer Nature journal article supplement (https://www.springermedizin.de/resource/supplementary/12885_2011_2848_MOESM5_ESM.pdf/9462082)

**A**

timepoint

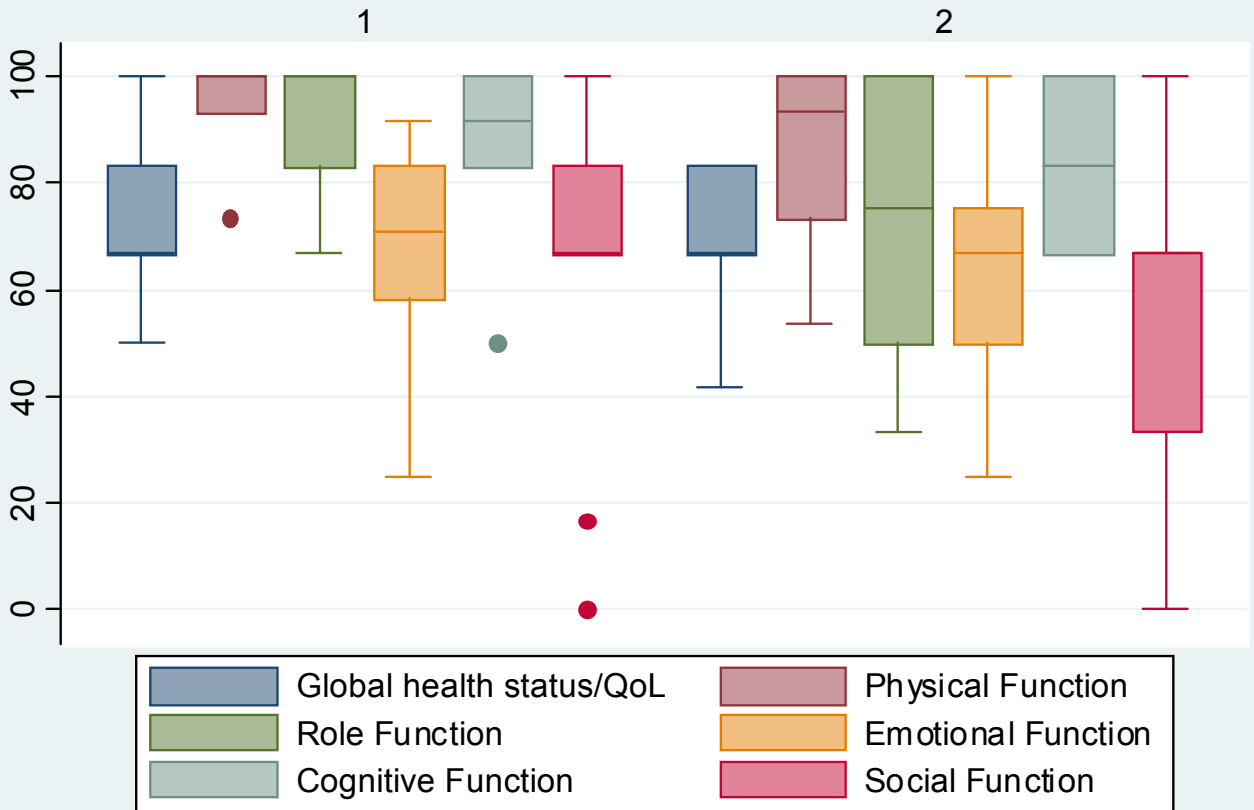**B**

timepoint

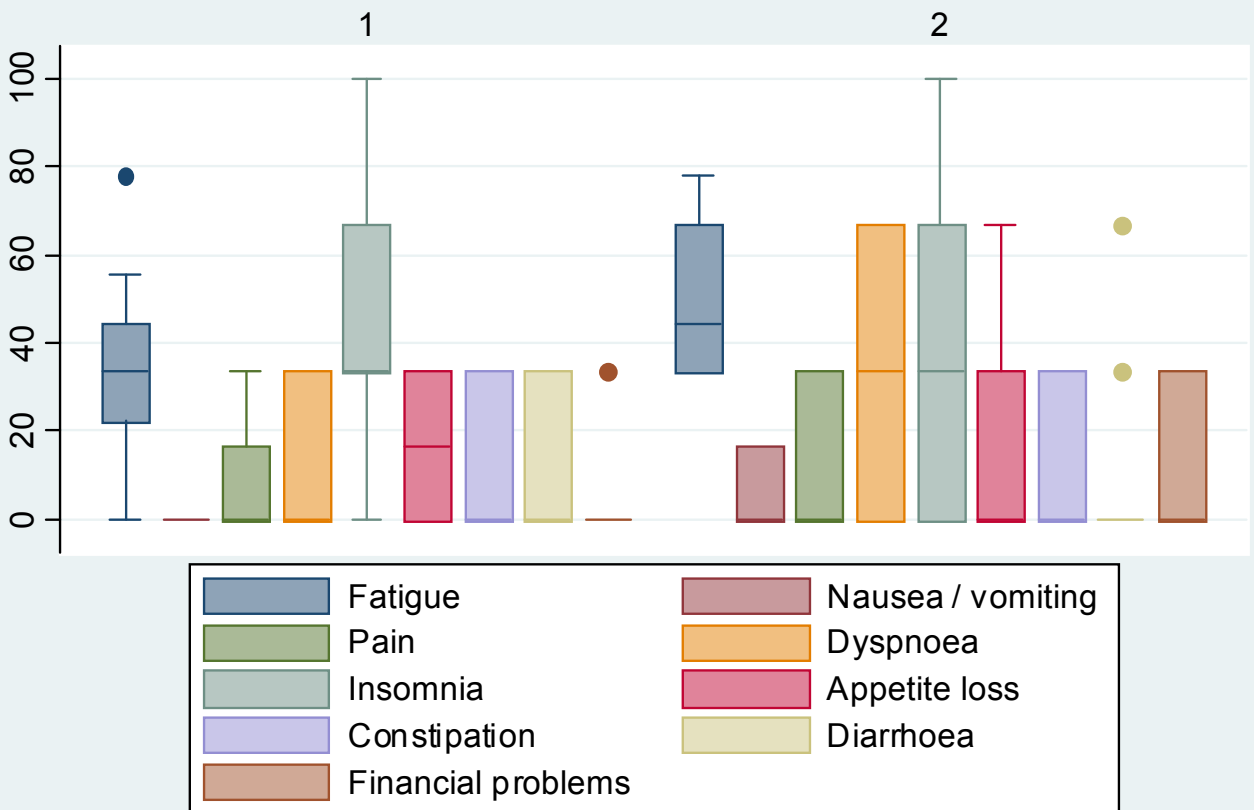

Supplement: MOESM5 [file 9462082]
